# Supplementary material
Source: MDPI journal article supplement (https://www.mdpi.com/2306-5710/8/1/4)
Supplement: s1 [file s1]

## Supplemental data

### Effect of production technique on Pilsner type Non-alcoholic beer (NAB) flavor

**Nils Rettberg<sup>±\*</sup>, Scott Lafontaine<sup>±\*</sup>, Christian Schubert, Johanna Dennenlöh, Laura Knoke, Patricia Diniz-Fischer, Johannes Fuchs, and Sarah Thörner**

Research Institute for Beer and Beverage Analysis, Versuchs– und Lehranstalt für Brauerei in Berlin (VLB) e.V., Seestr. 13, 13353 Berlin, Germany

<sup>±</sup>NR and SL contributed to this work equally

\*Correspondence: NR, n.rettberg@vlb-berlin.org; Tel.: +49 30 45080106;

SL, scott.r.lafontaine@gmail.com; Tel.: +49 176 63636721

#### ***Table of contents:***

Table S1: Additional physiochemical analysis results, Table S2: Concentrations of acetaldehyde, higher alcohols, and esters (mg/L) as well as the concentration of 3-MBT (ng/L), Table S3: Concentration of staling aldehydes and ethyl nicotinate (µg/L), Table S4: Concentrations of hop derived aroma compounds, ethyl esters and DMS (µg/L), Figure S1. Ballot used for modified descriptive analysis., Table S5. Mixed model analysis of variance on the sensory attributes, Table S6: Least square mean values sensory terms sorted by overall harmony.

**Table S1:** Additional nonvolatile analysis results

| Samples | Treatment | Fructose | Glucose | Sucrose | Maltose | Maltotriose | Glycerol | Protein | Dextrins           | Fermentable Carbohydrates | Foam (SKZ)        |
|---------|-----------|----------|---------|---------|---------|-------------|----------|---------|--------------------|---------------------------|-------------------|
|         |           | Sug1     | Sug2    | Sug3    | Sug4    | Sug5        | GLY      |         |                    |                           |                   |
| C1      | COM       | 1.08     | 1.83    | 0.10    | 12.00   | 2.82        | 1.07     | 0.51    | 2.15               | 1.77                      | 104.00            |
| C2      | COM       | 2.45     | 6.30    | 0.10    | 28.32   | 7.65        | 0.07     | 0.42    | 2.02               | 4.43                      | 123.00            |
| C3      | COM       | 2.04     | 3.88    | 0.10    | 21.86   | 7.82        | 0.53     | 0.32    | 0.70               | 3.60                      | 111.00            |
| C4      | COM       | 2.37     | 3.49    | 0.10    | 21.29   | 7.34        | 0.21     | 0.51    | 1.94               | 3.45                      | 109.00            |
| C5      | COM       | 2.06     | 2.92    | 0.10    | 16.21   | 6.61        | 0.19     | 0.50    | 2.26               | 2.78                      | 104.00            |
| C6      | COM       | 2.07     | 5.14    | 0.10    | 23.11   | 6.84        | 0.19     | 0.45    | 1.86               | 3.72                      | 121.00            |
| C7      | COM       | 1.68     | 3.47    | 0.10    | 20.55   | 5.30        | 0.61     | 0.30    | 1.15               | 3.09                      | 114.00            |
| C8      | COM       | 1.42     | 3.28    | 0.10    | 16.95   | 5.73        | 0.78     | 0.42    | 1.29               | 2.74                      | 108.00            |
| C9      | COM       | 2.54     | 5.14    | 0.10    | 28.12   | 12.79       | 0.22     | 0.37    | 1.08               | 4.85                      | 106.00            |
| M1      | M         | 0.10     | 0.10    | 0.10    | 0.40    | 0.20        | 0.55     | 0.35    | 0.94               | 0.10                      | 105.00            |
| MI1     | MI        | 1.56     | 1.07    | 0.10    | 34.17   | 8.80        | 0.23     | 0.35    | 1.31               | 4.50                      | 112.00            |
| MI2     | MI        | 0.47     | 0.10    | 2.83    | 33.11   | 12.69       | 0.15     | 0.30    | 1.71               | 4.98                      | 120.00            |
| RF1     | RF        | 1.78     | 3.31    | 0.10    | 24.78   | 6.57        | 0.18     | 0.24    | 1.72               | 3.64                      | 101.00            |
| RF2     | RF        | 2.58     | 6.50    | 0.10    | 29.70   | 7.91        | 0.19     | 0.54    | 1.97               | 4.69                      | 118.00            |
| RF3     | RF        | 2.46     | 6.26    | 0.10    | 31.87   | 8.30        | 0.16     | 0.48    | 2.42               | 4.88                      | 115.00            |
| RF4     | RF        | 2.19     | 5.11    | 0.10    | 29.26   | 8.65        | 0.27     | 0.45    | 2.34               | 4.55                      | 113.00            |
| V1      | VAC       | 0.10     | 0.10    | 0.10    | 0.40    | 0.20        | 1.48     | 0.41    | 2.71               | 0.10                      | 110.00            |
| V2      | VAC       | 3.21     | 7.39    | 0.10    | 33.24   | 11.21       | 0.50     | 0.44    | 2.22               | 5.49                      | 108.00            |
| V3      | VAC       | 0.10     | 0.10    | 0.10    | 0.40    | 0.40        | 1.29     | 0.46    | 1.20               | 0.10                      | 102.00            |
| V4      | VAC       | 0.10     | 0.10    | 0.10    | 7.21    | 4.25        | 1.67     | 0.52    | 1.67               | 1.16                      | 107.00            |
|         | %RSD      | 0.7%     | 0.9%    | 3.6%    | 2.0%    | 1.5%        | 1.0%     | < 0.5%  | < 0.5 <sup>#</sup> | 1.1 <sup>%</sup>          | 1.1 <sup>\$</sup> |

The concentration of the individual sugars, glycerol, as well as the sum of fermentable carbohydrates is given in mg/L, while dextrins and proteins are given in g/100 mL. For analytes that were present in concentrations below the LOQ of the respective method of analysis values were by 1/3 of the LOQ prior to running statistical analysis. In this table, these values appear in grey. Concentrations/ values are the calculated means of duplicate measurements and not rounded.

<sup>%</sup>Measurement precision based on relative standard deviation (RSD or %RSD) from 6-fold repeat analysis of sample C8

<sup>\$</sup>Measurement precision based on relative standard deviation (RSD or %RSD) from 6-fold repeat analysis of a reference lager beer with the reported mean as follows: foam (SKZ), 91.

<sup>#</sup>Measurement precision based on relative standard deviation (RSD or %RSD) from 6-fold repeat analysis of a reference solution with the reported mean as follows: dextrins (g/100mL), 0.4.

**Table S2:** Concentrations of acetaldehyde, higher alcohols, and esters (mg/L) as well as the concentration of 3-MBT (ng/L).

| Samples | Treatment | Acetaldehyde       | Ethyl acetate      | 1-Propanol        | Isobutanol        | Isoamyl acetate    | 2-Methyl-1-Butanol | 3-Methyl-1-Butanol | Phenethyl acetate  | Phenyl ethanol    | 3-methyl-2-butene-1-thiol |
|---------|-----------|--------------------|--------------------|-------------------|-------------------|--------------------|--------------------|--------------------|--------------------|-------------------|---------------------------|
|         |           | A1                 | A2                 | A3                | A4                | A5                 | A6                 | A7                 | A8                 | A9                | 3MBT                      |
| C1      | COM       | 1.75               | 4.11               | 0.17              | 0.33              | 2.27               | 3.50               | 31.80              | 1.12               | 19.64             | 9.80                      |
| C2      | COM       | 0.33               | 0.17               | 0.17              | 0.33              | 0.17               | 0.33               | 1.09               | 0.03               | 0.33              | 7.50                      |
| C3      | COM       | 1.41               | 0.17               | 0.17              | 0.33              | 0.17               | 0.33               | 0.33               | 0.03               | 7.39              | 7.00                      |
| C4      | COM       | 2.32               | 0.60               | 2.15              | 1.18              | 0.17               | 0.33               | 3.71               | 0.03               | 1.57              | 4.50                      |
| C5      | COM       | 1.78               | 0.43               | 1.69              | 1.93              | 0.17               | 0.33               | 3.49               | 0.03               | 1.55              | 4.90                      |
| C6      | COM       | 1.38               | 1.02               | 1.64              | 1.47              | 0.17               | 1.70               | 7.23               | 0.03               | 4.32              | 4.60                      |
| C7      | COM       | 1.37               | 0.17               | 0.58              | 0.33              | 0.17               | 0.33               | 1.13               | 0.03               | 10.43             | 2.30                      |
| C8      | COM       | 1.18               | 0.55               | 1.47              | 0.68              | 0.17               | 0.33               | 3.63               | 0.03               | 10.92             | 3.80                      |
| C9      | COM       | 0.33               | 0.55               | 24.29             | 1.78              | 0.17               | 1.32               | 3.87               | 0.03               | 3.55              | 2.70                      |
| M1      | M         | 0.33               | 1.21               | 0.85              | 2.35              | 0.17               | 3.52               | 18.13              | 0.16               | 7.81              | 4.40                      |
| MI1     | MI        | 1.93               | 0.46               | 1.59              | 1.85              | 0.17               | 0.33               | 5.69               | 0.03               | 4.92              | 4.30                      |
| MI2     | MI        | 0.33               | 0.17               | 4.56              | 1.34              | 0.17               | 1.02               | 5.61               | 0.03               | 1.36              | 5.60                      |
| RF1     | RF        | 1.94               | 0.51               | 1.28              | 0.33              | 0.17               | 0.33               | 5.12               | 0.03               | 0.33              | 5.00                      |
| RF2     | RF        | 1.38               | 0.17               | 0.75              | 0.33              | 0.17               | 0.33               | 1.10               | 0.03               | 0.33              | 12.40                     |
| RF3     | RF        | 2.95               | 0.65               | 0.69              | 0.33              | 0.17               | 0.33               | 1.75               | 0.03               | 1.04              | 3.80                      |
| RF4     | RF        | 1.77               | 0.17               | 1.77              | 0.33              | 0.17               | 0.33               | 4.93               | 0.03               | 1.36              | 2.40                      |
| V1      | VAC       | 1.48               | 0.17               | 0.82              | 0.33              | 0.17               | 0.33               | 0.33               | 0.11               | 61.90             | 8.00                      |
| V2      | VAC       | 0.33               | 0.17               | 0.17              | 0.33              | 0.17               | 0.33               | 0.33               | 0.03               | 7.74              | 4.30                      |
| V3      | VAC       | 0.33               | 5.01               | 0.88              | 0.33              | 0.61               | 1.11               | 5.36               | 0.03               | 27.07             | 23.80                     |
| V4      | VAC       | 3.31               | 0.79               | 0.57              | 0.33              | 0.17               | 0.33               | 1.94               | 0.03               | 21.78             | 4.40                      |
|         | %RSD      | 11.4 <sup>\$</sup> | 11.3 <sup>\$</sup> | 2.9 <sup>\$</sup> | 3.2 <sup>\$</sup> | 10.8 <sup>\$</sup> | 5.9 <sup>\$</sup>  | 3.6 <sup>\$</sup>  | 12.7 <sup>\$</sup> | 8.6 <sup>\$</sup> | 10.7 <sup>\$</sup>        |

Analytes that were present below LOQ were replaced by using 1/3 of the LOQ for statistical analysis. In this table, these values appear in grey. Concentrations are the calculated means of duplicate measurements and not rounded.

<sup>\$</sup>Measurement precision based on relative standard deviation (RSD or %RSD) from 6-fold repeat analysis of a reference lager beer with calculated mean concentrations (mg/L) as follows: Acetaldehyde, 3.25; Ethyl acetate, 10.78; Propanol, 2.93; Isobutanol, 14.45; Isoamylacetate, 0.66; 2-Methyl-1-Butanol, 10.86; 3-Methyl-1-Butanol, 46.80; Phenethyl acetate, 0.32; Phenyl ethanol, 45.06.

<sup>\$</sup>Measurement precision based on relative standard deviation (RSD or %RSD) from 6-fold repeat analysis of sample C8

**Table S3:** Concentration of staling aldehydes and ethyl nicotinate (µg/L)

| Samples | Treatment | 2-Methylpropanal | Ethyl nicotinate | 2-Methylbutanal | 3-Methylbutanal | Pentanal | Hexanal | 2-Furfural | Heptanal | Methional | Octanal | Benzaldehyde | Phenylacetaldehyde | Nonanal | E-2-Nonenal | Decanal | E,E-2,4-Decadienal |
|---------|-----------|------------------|------------------|-----------------|-----------------|----------|---------|------------|----------|-----------|---------|--------------|--------------------|---------|-------------|---------|--------------------|
|         |           | SAI1             | SAI2             | SAI3            | SAI4            | SAI5     | SAI6    | SAI7       | SAI8     | SAI9      | SAI10   | SAI11        | SAI12              | SAI13   | SAI14       | SAI15   | SAI16              |
| C1      | COM       | 35.64            | 5.26             | 5.08            | 62.32           | 0.36     | 0.74    | 70.53      | 0.16     | 4.29      | 0.10    | 0.96         | 12.82              | 0.25    | 0.05        | 0.34    | 0.02               |
| C2      | COM       | 31.11            | 0.08             | 6.79            | 17.60           | 0.26     | 0.50    | 78.73      | 0.11     | 22.42     | 0.05    | 0.70         | 16.75              | 0.10    | 0.06        | 0.16    | 0.02               |
| C3      | COM       | 21.48            | 0.78             | 4.71            | 9.84            | 0.26     | 0.59    | 94.34      | 0.12     | 3.71      | 0.07    | 0.66         | 9.17               | 0.17    | 0.07        | 0.17    | 0.02               |
| C4      | COM       | 25.93            | 2.21             | 11.58           | 30.88           | 0.30     | 0.84    | 100.00     | 0.28     | 4.50      | 0.13    | 1.50         | 22.87              | 0.61    | 0.32        | 0.42    | 0.05               |
| C5      | COM       | 14.91            | 1.09             | 6.73            | 16.69           | 0.14     | 0.29    | 60.48      | 0.25     | 2.72      | 0.13    | 1.12         | 15.97              | 0.66    | 0.19        | 0.33    | 0.02               |
| C6      | COM       | 15.20            | 1.46             | 4.65            | 12.89           | 0.21     | 0.52    | 101.77     | 0.12     | 6.88      | 0.12    | 2.45         | 23.06              | 0.37    | 0.20        | 0.56    | 0.03               |
| C7      | COM       | 24.87            | 1.22             | 8.45            | 21.86           | 0.42     | 1.04    | 101.26     | 0.21     | 9.95      | 0.24    | 2.79         | 31.14              | 0.55    | 0.25        | 0.26    | 0.03               |
| C8      | COM       | 24.21            | 2.59             | 4.41            | 13.84           | 0.22     | 0.49    | 73.07      | 0.09     | 6.43      | 0.09    | 1.87         | 23.41              | 0.29    | 0.09        | 0.31    | 0.02               |
| C9      | COM       | 54.34            | 0.90             | 7.02            | 10.26           | 0.44     | 0.75    | 89.71      | 0.40     | 16.94     | 0.18    | 5.79         | 13.03              | 0.65    | 0.08        | 0.81    | 0.01               |
| M1      | M         | 50.05            | 1.94             | 21.61           | 55.32           | 0.63     | 1.32    | 250.93     | 0.42     | 69.97     | 0.06    | 2.02         | 62.98              | 0.15    | 0.06        | 0.17    | 0.02               |
| MI1     | MI        | 53.66            | 1.76             | 4.62            | 9.59            | 0.18     | 0.40    | 121.00     | 0.11     | 5.15      | 0.12    | 1.95         | 29.25              | 0.31    | 0.12        | 0.20    | 0.02               |
| MI2     | MI        | 48.02            | 2.35             | 17.72           | 25.63           | 0.42     | 0.71    | 84.67      | 0.27     | 15.92     | 0.12    | 1.56         | 25.11              | 0.43    | 0.05        | 0.37    | 0.01               |
| RF1     | RF        | 14.08            | 0.42             | 6.85            | 15.97           | 0.15     | 0.27    | 42.72      | 0.15     | 5.83      | 0.05    | 1.21         | 12.53              | 0.17    | 0.05        | 0.23    | 0.01               |
| RF2     | RF        | 47.96            | 0.26             | 18.49           | 50.89           | 0.59     | 1.47    | 33.52      | 0.19     | 29.43     | 0.07    | 1.60         | 20.68              | 0.22    | 0.09        | 0.27    | 0.02               |
| RF3     | RF        | 40.84            | 2.29             | 15.22           | 29.35           | 0.57     | 1.34    | 64.40      | 0.14     | 20.58     | 0.05    | 4.15         | 40.11              | 0.10    | 0.13        | 0.14    | 0.02               |
| RF4     | RF        | 34.30            | 1.04             | 14.90           | 48.77           | 0.36     | 0.77    | 173.49     | 0.17     | 14.21     | 0.14    | 2.18         | 49.72              | 0.45    | 0.37        | 0.31    | 0.03               |
| V1      | VAC       | 20.35            | 3.03             | 2.92            | 9.53            | 0.21     | 0.38    | 74.69      | 0.12     | 2.04      | 0.09    | 0.70         | 7.14               | 0.22    | 0.05        | 0.21    | 0.01               |
| V2      | VAC       | 36.55            | 0.38             | 11.71           | 22.75           | 0.44     | 0.99    | 35.22      | 0.13     | 24.50     | 0.05    | 1.48         | 23.77              | 0.13    | 0.08        | 0.17    | 0.02               |
| V3      | VAC       | 24.13            | 3.85             | 4.26            | 12.98           | 0.25     | 0.55    | 149.69     | 0.18     | 4.24      | 0.11    | 2.33         | 22.39              | 0.35    | 0.23        | 0.49    | 0.03               |
| V4      | VAC       | 71.16            | 5.07             | 4.90            | 19.37           | 0.20     | 0.42    | 31.31      | 0.14     | 4.74      | 0.09    | 1.00         | 15.60              | 0.22    | 0.04        | 0.29    | 0.01               |
|         | %RSD      | 2.4*             | 9.2 <sup>§</sup> | 2.3*            | 2.3*            | 4.5*     | 4.0*    | 5.5*       | 3.9*     | 9.2*      | 4.9*    | 4.9*         | 1.6*               | 7.0*    | 5.1*        | 8.3*    | 2.6*               |

Concentrations are the calculated means of duplicate measurements and not rounded.

\*Measurement precision based on relative standard deviation (RSD or %RSD) from 6-fold repeat analysis as previously published (<https://doi.org/10.1080/03610470.2020.1795478>).

<sup>§</sup>Measurement precision based on relative standard deviation (RSD or %RSD) from 6-fold repeat analysis of a reference lager beer with calculated mean concentrations (µg/L) as follows: Ethyl nicotinate, 7.99.

**Table S4:** Concentrations of hop derived aroma compounds, ethyl esters and DMS (µg/L)

| Samples | Treatment | $\alpha$ -Pinene | Myrcene | 2-Methylbutyl isobutyrate | Limonene | cis-Linalool oxide | trans-Linalool oxide | Linalool | Terpineol | Citronellol | Nerol | Geraniol | Humulene | Ethyl butyrate   | Ethyl hexanoate  | Ethyl octanoate  | DMS              |
|---------|-----------|------------------|---------|---------------------------|----------|--------------------|----------------------|----------|-----------|-------------|-------|----------|----------|------------------|------------------|------------------|------------------|
|         |           | Hop1             | Hop2    | Hop3                      | Hop4     | Hop5               | Hop6                 | Hop7     | Hop8      | Hop9        | Hop10 | Hop11    | Hop12    | EST1             | EST2             | EST3             | DMS              |
| C1      | COM       | 0.33             | 2.21    | 0.33                      | 0.33     | 0.33               | 0.33                 | 0.33     | 0.33      | 0.33        | 0.33  | 0.33     | 0.33     | 14.75            | 61.59            | 14.07            | 10.00            |
| C2      | COM       | 0.33             | 3.75    | 0.33                      | 0.33     | 1.14               | 0.33                 | 4.57     | 2.53      | 1.10        | 0.33  | 1.47     | 0.33     | 1.67             | 1.67             | 12.92            | 39.00            |
| C3      | COM       | 0.33             | 2.54    | 0.33                      | 0.33     | 0.33               | 0.33                 | 1.29     | 0.33      | 1.95        | 0.33  | 1.17     | 0.33     | 1.67             | 1.67             | 7.16             | 29.00            |
| C4      | COM       | 0.33             | 56.61   | 116.46                    | 4.32     | 0.33               | 0.33                 | 37.37    | 11.99     | 5.80        | 7.86  | 20.85    | 0.33     | 1.67             | 5.42             | 10.87            | 22.00            |
| C5      | COM       | 0.33             | 48.17   | 307.31                    | 6.30     | 1.21               | 1.05                 | 48.21    | 66.66     | 6.81        | 5.59  | 17.60    | 0.33     | 1.67             | 5.52             | 10.26            | 25.00            |
| C6      | COM       | 0.33             | 3.79    | 0.33                      | 0.33     | 0.33               | 0.33                 | 6.13     | 2.44      | 1.44        | 0.33  | 1.70     | 0.33     | 1.67             | 13.63            | 27.13            | 37.00            |
| C7      | COM       | 0.33             | 3.63    | 0.33                      | 1.13     | 0.33               | 0.33                 | 3.82     | 1.67      | 1.06        | 0.33  | 0.33     | 0.33     | 1.67             | 1.67             | 7.38             | 30.00            |
| C8      | COM       | 0.33             | 2.25    | 0.33                      | 1.15     | 0.33               | 0.33                 | 0.33     | 0.33      | 0.33        | 0.33  | 0.33     | 0.33     | 1.67             | 5.63             | 12.45            | 10.00            |
| C9      | COM       | 0.33             | 104.55  | 64.30                     | 25.71    | 75.90              | 65.83                | 540.45   | 55.10     | 3.98        | 21.95 | 132.74   | 1.64     | 1.67             | 1.67             | 8.96             | 31.00            |
| M1      | M         | 5.05             | 4.04    | 0.33                      | 1.88     | 0.33               | 0.33                 | 2.30     | 1.33      | 1.86        | 0.33  | 2.46     | 0.33     | 18.90            | 26.33            | 23.13            | 29.00            |
| MI1     | MI        | 0.33             | 2.73    | 0.33                      | 0.33     | 0.33               | 0.33                 | 1.71     | 2.38      | 0.33        | 1.00  | 0.33     | 0.33     | 1.67             | 1.67             | 7.34             | 26.00            |
| MI2     | MI        | 0.33             | 124.99  | 89.67                     | 21.84    | 7.55               | 6.72                 | 260.71   | 40.95     | 38.87       | 45.62 | 312.81   | 1.82     | 1.67             | 1.67             | 9.12             | 26.00            |
| RF1     | RF        | 0.33             | 5.44    | 33.98                     | 2.07     | 1.11               | 0.33                 | 23.20    | 25.50     | 6.51        | 6.94  | 7.14     | 0.33     | 1.67             | 1.67             | 8.39             | 54.00            |
| RF2     | RF        | 0.33             | 10.03   | 1.62                      | 2.06     | 1.32               | 0.99                 | 32.69    | 10.66     | 2.17        | 3.97  | 14.95    | 0.33     | 1.67             | 1.67             | 8.52             | 34.00            |
| RF3     | RF        | 0.33             | 2.41    | 0.33                      | 0.33     | 0.33               | 0.33                 | 1.05     | 0.33      | 1.51        | 0.33  | 0.33     | 0.33     | 1.67             | 6.96             | 6.94             | 31.00            |
| RF4     | RF        | 0.33             | 7.89    | 1.90                      | 1.31     | 1.30               | 0.98                 | 25.53    | 6.02      | 1.57        | 2.07  | 3.25     | 0.33     | 1.67             | 1.67             | 8.35             | 33.00            |
| V1      | VAC       | 0.33             | 2.22    | 0.33                      | 0.33     | 0.33               | 0.33                 | 0.33     | 0.33      | 0.33        | 0.33  | 0.33     | 0.33     | 1.67             | 1.67             | 26.81            | 10.00            |
| V2      | VAC       | 0.33             | 2.13    | 0.33                      | 0.33     | 0.33               | 0.33                 | 0.33     | 0.33      | 0.33        | 0.33  | 0.33     | 0.33     | 1.67             | 1.67             | 6.63             | 10.00            |
| V3      | VAC       | 0.33             | 2.29    | 0.33                      | 0.33     | 0.33               | 0.33                 | 0.33     | 0.33      | 0.33        | 0.33  | 0.33     | 0.33     | 32.51            | 75.42            | 60.10            | 10.00            |
| V4      | VAC       | 0.33             | 2.28    | 0.33                      | 0.33     | 0.33               | 0.33                 | 0.33     | 0.33      | 0.33        | 0.33  | 0.33     | 0.33     | 1.67             | 6.89             | 19.57            | 10.00            |
|         | %RSD      | 5.6*             | 5.3*    | 7.3*                      | 6.6*     | 5.4*               | 7.5*                 | 1.7*     | 5.2*      | 3.4*        | 5.4*  | 5.4*     | 8.1*     | 3.5 <sup>§</sup> | 3.5 <sup>§</sup> | 3.4 <sup>§</sup> | 3.4 <sup>§</sup> |

Analyses that were present below LOQ were replaced by using 1/3 of the LOQ for statistical analysis. In this table, these values appear in grey. Concentrations are the calculated means of duplicate measurements and not rounded.

\*Measurement precision based on relative standard deviation (RSD or %RSD) from 6-fold repeat analysis as previously published (<https://doi.org/10.1080/03610470.2019.1668223>).

%Measurement precision based on relative standard deviation (RSD or %RSD) from 6-fold repeat analysis of sample C8

<sup>§</sup>Measurement precision based on relative standard deviation (RSD or %RSD) from 6-fold repeat analysis of reference lager beers with calculated mean concentrations (µg/L) as follows: ethyl butyrate, 61.63; ethyl hexanoate, 100.72; ethyl octanoate, 196.47; dimethyl sulfide (DMS), 32.3.

Sample:

Date:

Name:

| Subcategory          | Intensity                               |                          |                                              |                          |                                          |                          |                                                 |                          |                                             | Deskriptoren (bitte unterschreiben)                                        |
|----------------------|-----------------------------------------|--------------------------|----------------------------------------------|--------------------------|------------------------------------------|--------------------------|-------------------------------------------------|--------------------------|---------------------------------------------|----------------------------------------------------------------------------|
|                      | 1                                       | 2                        | 3                                            | 4                        | 5                                        | 6                        | 7                                               | 8                        | 9                                           |                                                                            |
| Quality of the smell | <input type="checkbox"/><br>very poor   | <input type="checkbox"/> | <input type="checkbox"/><br>weak             | <input type="checkbox"/> | <input type="checkbox"/><br>satisfactory | <input type="checkbox"/> | <input type="checkbox"/><br>good                | <input type="checkbox"/> | <input type="checkbox"/><br>very good       | Diacetyl, oxidation, metallic, DMS, sulfurous, solvent, dull, cheesy, etc. |
| Quality of taste     | <input type="checkbox"/><br>very poor   | <input type="checkbox"/> | <input type="checkbox"/><br>weak             | <input type="checkbox"/> | <input type="checkbox"/><br>satisfactory | <input type="checkbox"/> | <input type="checkbox"/><br>good                | <input type="checkbox"/> | <input type="checkbox"/><br>very good       | Diacetyl, oxidation, metallic, DMS, sulfurous, solvent, dull, cheesy, etc. |
| Hop aroma            | <input type="checkbox"/><br>not present | <input type="checkbox"/> | <input type="checkbox"/><br>slightly present | <input type="checkbox"/> | <input type="checkbox"/><br>present      | <input type="checkbox"/> | <input type="checkbox"/><br>pronounced          | <input type="checkbox"/> | <input type="checkbox"/><br>very pronounced | Citrus, floral, spices/herbs, tropical, pine/resinous, grassy              |
| Sweetness            | <input type="checkbox"/><br>dry         | <input type="checkbox"/> | <input type="checkbox"/><br>semi-dry         | <input type="checkbox"/> | <input type="checkbox"/><br>medium       | <input type="checkbox"/> | <input type="checkbox"/><br>sweet               | <input type="checkbox"/> | <input type="checkbox"/><br>very sweet      |                                                                            |
| Sourness             | <input type="checkbox"/><br>none        | <input type="checkbox"/> | <input type="checkbox"/><br>light            | <input type="checkbox"/> | <input type="checkbox"/><br>moderate     | <input type="checkbox"/> | <input type="checkbox"/><br>pronounced          | <input type="checkbox"/> | <input type="checkbox"/><br>strong          |                                                                            |
| Bitterness Intensity | <input type="checkbox"/><br>very low    | <input type="checkbox"/> | <input type="checkbox"/><br>low              | <input type="checkbox"/> | <input type="checkbox"/><br>moderate     | <input type="checkbox"/> | <input type="checkbox"/><br>pronounced          | <input type="checkbox"/> | <input type="checkbox"/><br>very high       |                                                                            |
| Bitterness Quality   | <input type="checkbox"/><br>very poor   | <input type="checkbox"/> | <input type="checkbox"/><br>weak             | <input type="checkbox"/> | <input type="checkbox"/><br>satisfactory | <input type="checkbox"/> | <input type="checkbox"/><br>good                | <input type="checkbox"/> | <input type="checkbox"/><br>very good       | astringent, lingering untypical                                            |
| Estery               | <input type="checkbox"/><br>not present | <input type="checkbox"/> | <input type="checkbox"/><br>slightly present | <input type="checkbox"/> | <input type="checkbox"/><br>present      | <input type="checkbox"/> | <input type="checkbox"/><br>pronounced          | <input type="checkbox"/> | <input type="checkbox"/><br>very pronounced | Ethyl acetate, isoamyl acetate, Acetaldehyde, Ethylhexanoate               |
| Worty                | <input type="checkbox"/><br>not present | <input type="checkbox"/> | <input type="checkbox"/><br>slightly present | <input type="checkbox"/> | <input type="checkbox"/><br>present      | <input type="checkbox"/> | <input type="checkbox"/><br>pronounced          | <input type="checkbox"/> | <input type="checkbox"/><br>very pronounced |                                                                            |
| Mouthfeel            | <input type="checkbox"/><br>watery      | <input type="checkbox"/> | <input type="checkbox"/><br>empty            | <input type="checkbox"/> | <input type="checkbox"/><br>light body   | <input type="checkbox"/> | <input type="checkbox"/><br>round body          | <input type="checkbox"/> | <input type="checkbox"/><br>heavy body      |                                                                            |
| Aftertaste duration  | <input type="checkbox"/><br>none        | <input type="checkbox"/> | <input type="checkbox"/><br>fast             | <input type="checkbox"/> | <input type="checkbox"/><br>moderate     | <input type="checkbox"/> | <input type="checkbox"/><br>slightly persistent | <input type="checkbox"/> | <input type="checkbox"/><br>persistent      |                                                                            |
| Overall Harmony      | <input type="checkbox"/><br>very poor   | <input type="checkbox"/> | <input type="checkbox"/><br>weak             | <input type="checkbox"/> | <input type="checkbox"/><br>satisfactory | <input type="checkbox"/> | <input type="checkbox"/><br>good                | <input type="checkbox"/> | <input type="checkbox"/><br>very good       |                                                                            |

Extra comments

Description of the odor:

positive

negative

Description of the taste:

positive

negative

Figure S1. Ballot used for modified descriptive analysis.

**Table S5.** Mixed model analysis of variance on the sensory attributes

| Source   | Type   | DF | Quality of smell |                   | Quality of taste |              | Sweet |                   | Sour      |                   | Bitterness Intensity |              | Bitterness Quality |              |
|----------|--------|----|------------------|-------------------|------------------|--------------|-------|-------------------|-----------|-------------------|----------------------|--------------|--------------------|--------------|
|          |        |    | F                | P-value           | F                | P-value      | F     | P-value           | F         | P-value           | F                    | P-value      | F                  | P-value      |
| Product  | Fixed  | 19 | 1.690            | <b>0.047</b>      | 1.967            | <b>0.015</b> | 6.024 | <b>&lt;0.0001</b> | 3.068     | <b>0.000</b>      | 1.701                | <b>0.045</b> | 1.796              | <b>0.031</b> |
| Panelist | Random | 11 | 1.320            | 0.222             | 1.575            | 0.115        | 0.980 | 0.469             | 2.459     | <b>0.008</b>      | 3.668                | <b>0.000</b> | 2.318              | <b>0.013</b> |
| Source   | Type   | DF | Hop aroma        |                   | Estery           |              | Worty |                   | Mouthfeel |                   | Aftertaste duration  |              | Overall Harmony    |              |
|          |        |    | F                | P-value           | F                | P-value      | F     | P-value           | F         | P-value           | F                    | P-value      | F                  | P-value      |
| Product  | Fixed  | 19 | 2.908            | <b>0.000</b>      | 1.789            | <b>0.032</b> | 6.047 | <b>&lt;0.0001</b> | 4.386     | <b>&lt;0.0001</b> | 1.339                | 0.172        | 2.427              | <b>0.002</b> |
| Panelist | Random | 11 | 5.510            | <b>&lt;0.0001</b> | 3.153            | <b>0.001</b> | 1.548 | 0.123             | 2.271     | <b>0.015</b>      | 1.644                | 0.095        | 2.054              | <b>0.029</b> |

Values in bold indicate p-value < 0.05

**Table S6:** Least square mean values sensory terms sorted by overall harmony.

|            | Overall Harmony | Aftertaste | Mouthfeel | Worty*    | Estery/ fruity* | Bitterness (quality) | Bitterness (Intensity)* | Sour*    | Sweet*   | Hop aroma* | Quality of Aroma | Quality of Taste |
|------------|-----------------|------------|-----------|-----------|-----------------|----------------------|-------------------------|----------|----------|------------|------------------|------------------|
| V1         | 4.14 g          | 6.00 bcd   | 4.00 g    | 2.57 i    | 2.29 cd         | 4.86 ef              | 7.00 a                  | 5.57 a   | 2.14 h   | 3.00 fgh   | 4.14 f           | 4.29 g           |
| RF3        | 4.43 g          | 6.57 abc   | 5.71 cde  | 7.43 a    | 2.00 d          | 5.50 abcdef          | 3.57 hi                 | 2.71 d   | 5.14 bc  | 2.29 h     | 4.86 ef          | 5.29 bcdefg      |
| RF1        | 4.57 fg         | 7.14 a     | 6.43 abcd | 5.71 bcd  | 2.29 cd         | 4.14 f               | 6.86 ab                 | 3.71 cd  | 4.43 cde | 3.71 efgh  | 6.40 abcde       | 6.57 ab          |
| V4         | 4.57 fg         | 5.86 bcd   | 4.71 efg  | 3.00 hi   | 2.57 cd         | 5.14 def             | 6.29 abcd               | 5.00 ab  | 3 fgh    | 3.00 fgh   | 5.14 def         | 4.43 fg          |
| M1         | 4.67 efg        | 4.67 e     | 4.17 fg   | 3.33 ghi  | 3.50 abc        | 6.17 abcde           | 3.50 i                  | 5.97 a   | 2.67 gh  | 3.17 fgh   | 5.50 bcdef       | 5.33 bcdefg      |
| V2         | 4.86 efg        | 5.86 bcd   | 7.14 a    | 6.43 abc  | 2.57 cd         | 4.71 ef              | 5.00 defgh              | 2.86 d   | 7.14 a   | 2.57 gh    | 5.29 cdef        | 5.86 bcdef       |
| RF2        | 4.89 efg        | 5.89 bcd   | 6.00 bcd  | 5.22 cdef | 2.78 cd         | 5.33 cdef            | 6.44 abcd               | 3.00 d   | 5.33 bc  | 5.33 cd    | 5.25 cdef        | 4.78 efg         |
| MI1        | 5.00 defg       | 5.43 de    | 5.29 def  | 4.14 efgh | 2.71 cd         | 5.86 abcde           | 4.71 efghi              | 3.43 d   | 4.43 cde | 3.86 efg   | 5.33 cdef        | 4.86 defg        |
| V3         | 5.00 defg       | 5.29 de    | 4.29 fg   | 2.57 i    | 2.71 cd         | 6.00 abcde           | 6.43 abcd               | 4.71 abc | 2.86 fgh | 3.43 fgh   | 5.57 bcdef       | 5.29 bcdefg      |
| C1         | 5.29 cdefg      | 5.29 de    | 4.71 efg  | 2.57 i    | 4.57 a          | 6.00 abcde           | 4.14 fghi               | 3.29 d   | 3.71 efg | 3.33 fgh   | 5.29 cdef        | 5.00 cdefg       |
| C2         | 5.43 bcdefg     | 6.00 bcd   | 7.00 ab   | 6.86 ab   | 2.43 cd         | 5.14 def             | 5.50 bcdef              | 2.71 d   | 5.57 b   | 2.71 gh    | 6.00 bcde        | 5.71 bcdefg      |
| C7         | 5.44 bcdefg     | 5.56 cde   | 6.44 abc  | 5.89 bcd  | 3.11 bcd        | 6.56 abcd            | 5.67 abcde              | 2.89 d   | 5.33 bc  | 3.67 efgh  | 6.25 abcde       | 6.33 abc         |
| C3         | 5.86 bcdef      | 5.43 de    | 6.14 abcd | 5.57 bcde | 2.57 cd         | 5.43 bcdef           | 5.00 defgh              | 3.14 d   | 5.00 bc  | 3.29 fgh   | 5.86 bcde        | 5.43 bcdefg      |
| RF4        | 6.00 bcde       | 5.44 de    | 4.56 fg   | 4.67 defg | 2.89 cd         | 6.00 abcde           | 5.00 defgh              | 2.78 d   | 5.00 bc  | 4.33 def   | 5.78 bcde        | 5.75 bcdef       |
| C5         | 6.14 abcde      | 5.14 de    | 6.33 abcd | 3.86 fghi | 3.14 abcd       | 6.86 ab              | 6.29 abcd               | 3.86 bcd | 4.86 bcd | 5.86 bc    | 6.43 abcd        | 5.57 bcdefg      |
| C9         | 6.22 abcd       | 5.67 cde   | 6.00 bcd  | 3.44 ghi  | 4.56 a          | 5.78 abcde           | 5.78 abcde              | 5.13 a   | 5.22 bc  | 7.00 b     | 6.44 abcd        | 6.11 bcd         |
| C8         | 6.29 abcd       | 5.43 de    | 6.57 abc  | 5.43 bcde | 2.71 cd         | 6.43 abcd            | 4.00 ghi                | 3.57 cd  | 5.29 bc  | 3.29 fgh   | 6.71 abc         | 6.71 ab          |
| C6         | 6.57 abc        | 5.43 de    | 6.14 abcd | 3.29 hi   | 2.86 cd         | 6.57 abcd            | 5.14 cdefg              | 2.71 d   | 3.00 fgh | 3.50 efgh  | 7.00 ab          | 6.00 bcde        |
| C4         | 6.71 ab         | 5.86 bcd   | 6.57 abc  | 3.29 hi   | 3.57 abc        | 6.71 abc             | 5.71 abcde              | 3.43 d   | 3.86 def | 5.00 cde   | 6.67 abcd        | 6.43 abc         |
| MI2        | 7.44 a          | 6.89 ab    | 6.56 abc  | 3.22 hi   | 4.33 ab         | 6.89 a               | 6.56 abc                | 3.33 d   | 5.33 bc  | 8.67 a     | 7.44 a           | 7.44 a           |
| LSD-value: | 1.26            | 1.02       | 1.02      | 1.28      | 1.3             | 1.36                 | 1.33                    | 1.06     | 0.92     | 1.34       | 1.34             | 1.3              |

\* The scaling for the attributes relates to Figure S1

Letters represent the Fisher Least Significant Difference (LSD) means comparison results within each attribute (i.e. column) p-value < 0.05
